# Supplementary material
Source: publisher site journal article supplement (https://www.dovepress.com/article/174655)
Supplement: Supplementary file 1 [file get_supplementary_file.php%3Ff%3D174655.pdf]

## **SUPPLEMENTARY INFORMATION**

Born to Sense: Biophysical Analyses of the Oxygen Sensing Prolyl Hydroxylase  
from the Simplest Animal *Trichoplax adhaerens*

1. Experimental Procedures
2. Supplementary figures
3. Supplementary tables

## 1. Experimental Procedures

### Materials

All chemicals were from Sigma Aldrich or Merck Chemicals, unless otherwise stated. Primers were from Sigma Aldrich. *Ta*ODD and *Hs*HIF1a CODD/NODD peptides, all prepared with a C-terminal amide, were from GL Biochem (Shanghai, China) and Chinapeptides (Suzhou, China).

### Protein production, crystallisation, and structure solution

#### *Recombinant protein production and purification*

DNA sequences encoding for *N*-terminally truncated and His<sub>6</sub>-tagged *Ta*PHD<sup>64-300</sup> and *Hs*PHD2<sup>181-426</sup> in the pET28a(+) vectors were expressed and the resultant proteins were purified as described in <sup>1</sup> and <sup>2</sup>. *Hs*PHD2<sup>181-426</sup> variants were produced as described.<sup>3</sup> All constructs were verified by DNA sequencing.

Vectors encoding for *Ta*PHD<sup>64-300</sup> and *Hs*PHD2<sup>181-426</sup> were transformed into *E. coli* BL21(DE3) cells. Recombinant protein production was induced with 0.5 mM isopropyl-β-D-thiogalactosidase (*Ta*PHD<sup>64-300</sup>: 4 h at 28 °C, followed by overnight growth at 18 °C, *Hs*PHD2<sup>181-426</sup>: 4 h at 28 °C). Cells were harvested and lysed by sonication in Tris-HCl (20 mM, pH 7.5) and NaCl (0.5 M); (glycerol (5 %) and DTT (5 mM) were added in the case of the *Ta*PHD<sup>64-300</sup> and *Hs*PHD2<sup>181-426</sup> variants). Proteins were purified by Ni<sup>2+</sup> affinity chromatography followed by size exclusion chromatography as reported.<sup>1</sup> Proteins were of > 95% purity, as determined by SDS-PAGE, and characterised by liquid chromatography-mass spectrometry analysis (Figure S8).

The S177R and P213R *Ta*PHD variants were prepared using DNA encoding for *N*-terminal truncated and His<sub>6</sub>-tagged wild-type *Ta*PHD<sup>64-300</sup> in the pET28a(+) vector by site-directed mutagenesis. Expression and purification were carried out as described for the wild-type *Ta*PHD<sup>64-300</sup>.<sup>1</sup> The vector encoding for the required proteins was transformed into *E. coli* BL21(DE3) and protein production was induced with 0.5 mM isopropyl-β-D-thiogalactosidase (4 h at 28°C, then overnight at 18°C). Cells were harvested and lysed by sonication in Tris-HCl (20 mM), pH 7.5, and

NaCl (0.5 M). The proteins were purified by Ni<sup>2+</sup> affinity chromatography followed by size exclusion chromatography.<sup>1</sup>

### *Crystallisation*

Crystallisation screens were carried out using the sitting drop vapour diffusion method in low profile 96 well/3-subwell Art Robbins Intelliplates (Hampton Research, CA, USA) and an Art Robbins PHENIX-RE automated liquid dispenser was used with 200-300 nL total drop volumes (1:2, 1:1, and 2:1 protein:well solution ratios) with 80 µL of precipitant solution in the well. Wells were sealed with StarSeal Advanced Polyolefin Film (STARLAB, UK). *Ta*PHD protein was used at 20 mg/mL in Tris-HCl (50 mM, pH7.5). Irregular crystals of *Ta*PHD with Mn(II)Cl<sub>2</sub> (2 mM) and IOX3 (2 mM, <sup>4</sup>) were obtained at 4 °C in conditions containing ammonium acetate (0.2 M), polyethylene glycol 3350 (25 % w/v), bis-tris (0.1 M, pH 5.5), and *Ta*PHD protein. Initial crystallisation conditions were optimised at room temperature by streak seeding under identical conditions except for the absence of IOX3. Crystals of the *Ta*PHD.*Ta*ODD complex with Mn(II)Cl<sub>2</sub> (1 mM) and NOG (2 mM) were obtained at 20 °C in a buffer condition containing ammonium acetate (0.31 M), polyethylene glycol 3350 (24 % w/v), bis-tris (0.1 M, pH 5.5), and 21mer *Ta*HIFα ODD peptide (*Ta*HIFα<sup>477-497</sup> EKEDYDDLAPFVPPPSFDNRL-NH<sub>2</sub>, 10 mM). Crystals were then harvested in nylon loops (Hampton Research) by transferring into a cryo-solution containing 25 % (v/v) glycerol in the well solution, then cryo-cooled by plunging in liquid nitrogen, and were stored under liquid nitrogen until data collection.

### *Data Collection and Structure Solution*

Data sets for the *Ta*PHD (to 1.2 Å resolution) and *Ta*PHD.*Ta*ODD (to 1.3 Å resolution) crystals were collected from single crystals at 100 K at the Diamond Light Source beamlines I04 and I02, respectively, both equipped with an ADSC Quantum 315r detector. Data were indexed, integrated and scaled using HKL-2000<sup>5</sup> (see Table 1 for data statistics). The *Ta*PHD crystals were space group *P*2<sub>1</sub> with one molecule in the asymmetric unit. The structure of *Ta*PHD was solved by molecular replacement using PHASER<sup>6</sup> using a structure of *Hs*PHD2 (PDB: 2G19) as the search model. The *Ta*PHD.*Ta*ODD crystals were space group *P*1 with one molecule in the asymmetric unit. The

structure of *Ta*PHD.*Ta*ODD was solved by molecular replacement using PHASER<sup>6</sup> and the *Ta*PHD structure as a search model. Maximum likelihood refinement including anisotropic displacement parameters for all atoms was carried out iteratively using PHENIX refine<sup>7</sup> and model building with COOT<sup>8</sup> until converging R and R<sub>free</sub> values no longer decreased.

## **Enzymatic assays**

### *2OG turnover monitoring by <sup>1</sup>H CPMG NMR experiments*

2OG to succinate turnover was monitored by <sup>1</sup>H Carr-Purcell-Meiboom-Gill (CPMG) NMR experiments; typical experimental parameters for CPMG NMR spectroscopy were as follows: total echo time, 40 ms; acquisition time, 2.72 s; relaxation delay, 2 s; number of transients, 64. The PROJECT-CPMG sequence (90°x-[τ-180°y-τ-90°y-τ-180°y-τ]n-acq) was applied.<sup>9</sup> Water suppression was achieved by pre-saturation. Data were processed using Bruker 3.1 software with a line broadening of 0.3 Hz. Assay mixtures contained *Ta*PHD or *Hs*PHD2 (20 μM), (NH<sub>4</sub>)<sub>2</sub>Fe(II)(SO<sub>4</sub>)<sub>2</sub> (125 μM), sodium (+)L-ascorbate (1 mM), *Hs*HIF1α CODD 19mer (DLDLEMLAPYIPMDDDFQL-NH<sub>2</sub>, 500 μM) or *Ta*HIFα ODD 25mer substrate (PINEKEDYDDLAPFVPPPSFDNRLY-NH<sub>2</sub>, 500 μM) where necessary, 2-oxoglutarate disodium salt (400 μM), in 10 % D<sub>2</sub>O and 90 % H<sub>2</sub>O, Tris-D<sub>11</sub> (50 mM), pH 7.5.

### *<sup>13</sup>C- *Hs*HIF1α CODD and <sup>13</sup>C- *Hs*HIF1α NODD displacement experiments*

The 1D CLIP HSQC displacement experiments were conducted using a Bruker AV700 instrument. 3 mm MATCH NMR tubes were used (Cortecnet). All experiments were performed at 298 K. The reporter *Hs*HIF1α CODD/NODD peptide (DLDLEMLAPYIPMDDDFQL-NH<sub>2</sub>/DALTLLAPAAGDTIISLDF-NH<sub>2</sub>) was <sup>13</sup>C labelled on all carbons in its proline ring. The CLIP-HSQC sequence was used for 1D HSQC experiments (without <sup>13</sup>C decoupling). A relaxation delay of 2 s was applied. The <sup>1</sup>J<sub>CH</sub> was set to 160 Hz. A 6.8 ms Q3.1000 180 degree pulse was used and selective irradiation was applied at the selective chemical shift. Assay mixtures contained <sup>13</sup>C-proline *Hs*HIF1α CODD/NODD (50 μM), *Ta*PHD (50 μM) (where necessary), 2-oxoglutarate disodium salt (50 μM) buffered with Tris-D<sub>11</sub> (50 mM), pH 7.5, in 10 % D<sub>2</sub>O and 90 % H<sub>2</sub>O.

*MALDI–TOF-MS enzymatic assays*

Matrix-assisted laser desorption/ionization time-of-flight mass spectrometry (MALDI-TOF-MS) assays were performed using a Waters® Micromass® MALDI micro MX™ mass spectrometer using a modified version of the reported procedure.<sup>10</sup> Unless otherwise stated, the following conditions were used: *Hs*PHD2 or *Ta*PHD (3.5 μM), *Hs*HIF1α CODD (DLDLEMLAPYIPMDDDFQL-NH<sub>2</sub>, 100 μM) or *Ta*HIFα ODD substrate (PINEKEDYDDLAPFVPPPSFDNRLY-NH<sub>2</sub>, 100 μM), (NH<sub>4</sub>)<sub>2</sub>Fe(II)(SO<sub>4</sub>)<sub>2</sub> (50 μM), sodium L-ascorbate (4 mM) and 2-oxoglutarate disodium salt (300 μM) in Tris (50 mM), pH 7.5. The reactions were incubated at 25 °C and quenched with formic acid (1 % v/v) at various time points. For steady-state kinetic experiments, the initial rates were determined by varying the concentration of one of the substrates/co-substrates (*Hs*HIF1α CODD, *Ta*ODD or 2OG) and maintaining fixed saturating concentrations of the other component. Hydroxylation levels were quantified using MassLynx™ V4.0.  $K_m$  and  $k_{cat}$  values were determined using GraphPad Prism®.

The O<sub>2</sub>-dependence of the reaction was determined according to the reported procedure<sup>11</sup> with a *Ta*PHD concentration of 4 μM. For safety reasons, it was not possible to test O<sub>2</sub>-concentrations > 60 %.

## 2. Supplementary figures

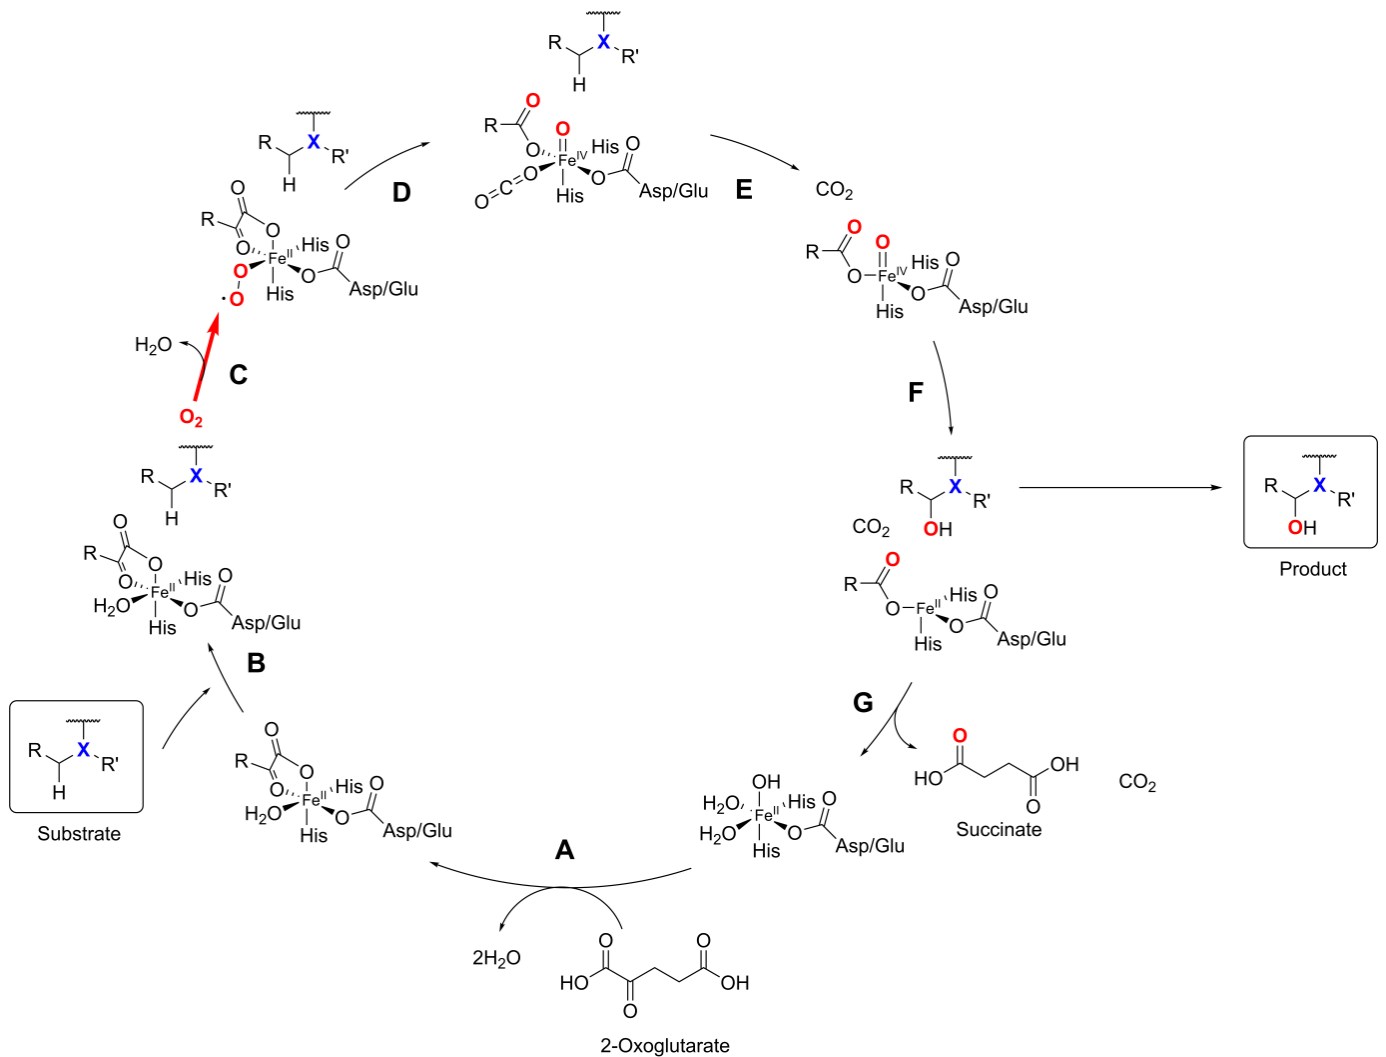

**Figure S1 | Outline of the consensus 2OG oxygenase mechanism.** Within the active site, Fe(II) is initially bound in a 6-coordinate manner by a conserved HX(D/E)...H motif and 2-3 water molecules, 2 of which are displaced on binding of 2-oxoglutarate (2OG, **A**). Subsequent binding of the substrate (**B**) then oxygen (**C**) leads to the displacement of the third water molecule. Binding of oxygen to the active site Fe(II) in *Hs*PHD2 has been proposed to be the rate limiting step in prolyl-hydroxylation.<sup>12</sup> Oxidative decarboxylation of 2OG generates CO<sub>2</sub> and succinate, leading to formation of a reactive Fe(IV)=O intermediate, which enables hydroxylation of the substrate (**D-G**).

## Evolution of HIF Prolyl Hydroxylases in Animals

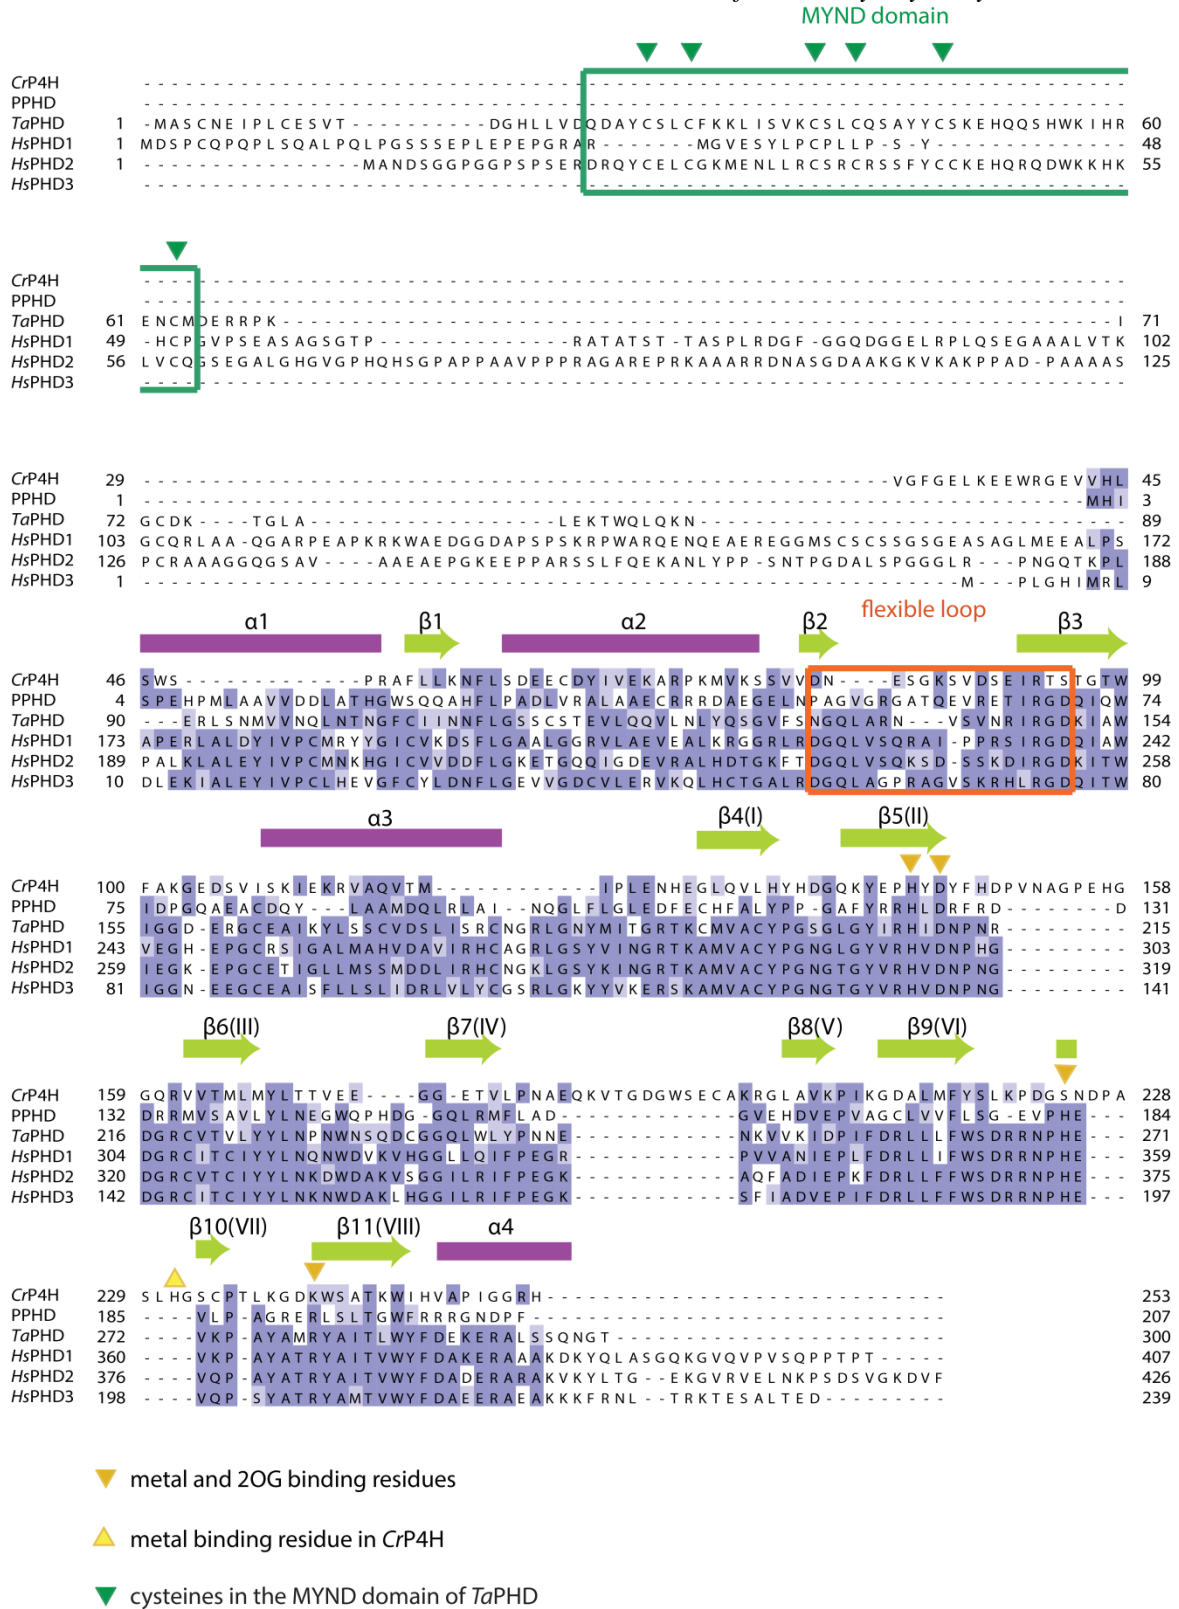

**Figure S2 | Comparison of the sequences of human PHD isoforms 1-3 with those for *TaPHD*, *CrP4H* and *Pseudomonas Putida* PPHD.** Sequences corresponding to the myeloid, Nervy, and DEAF-1 (MYND) motif and the flexible  $\beta$ 2/ $\beta$ 3-finger-loop are boxed,  $\alpha$ -helices are marked purple, and  $\beta$ -sheets are labelled with green arrows. The alignment was generated using Clustal Omega<sup>13</sup> and Jalview 2.9.0b2.<sup>14</sup>

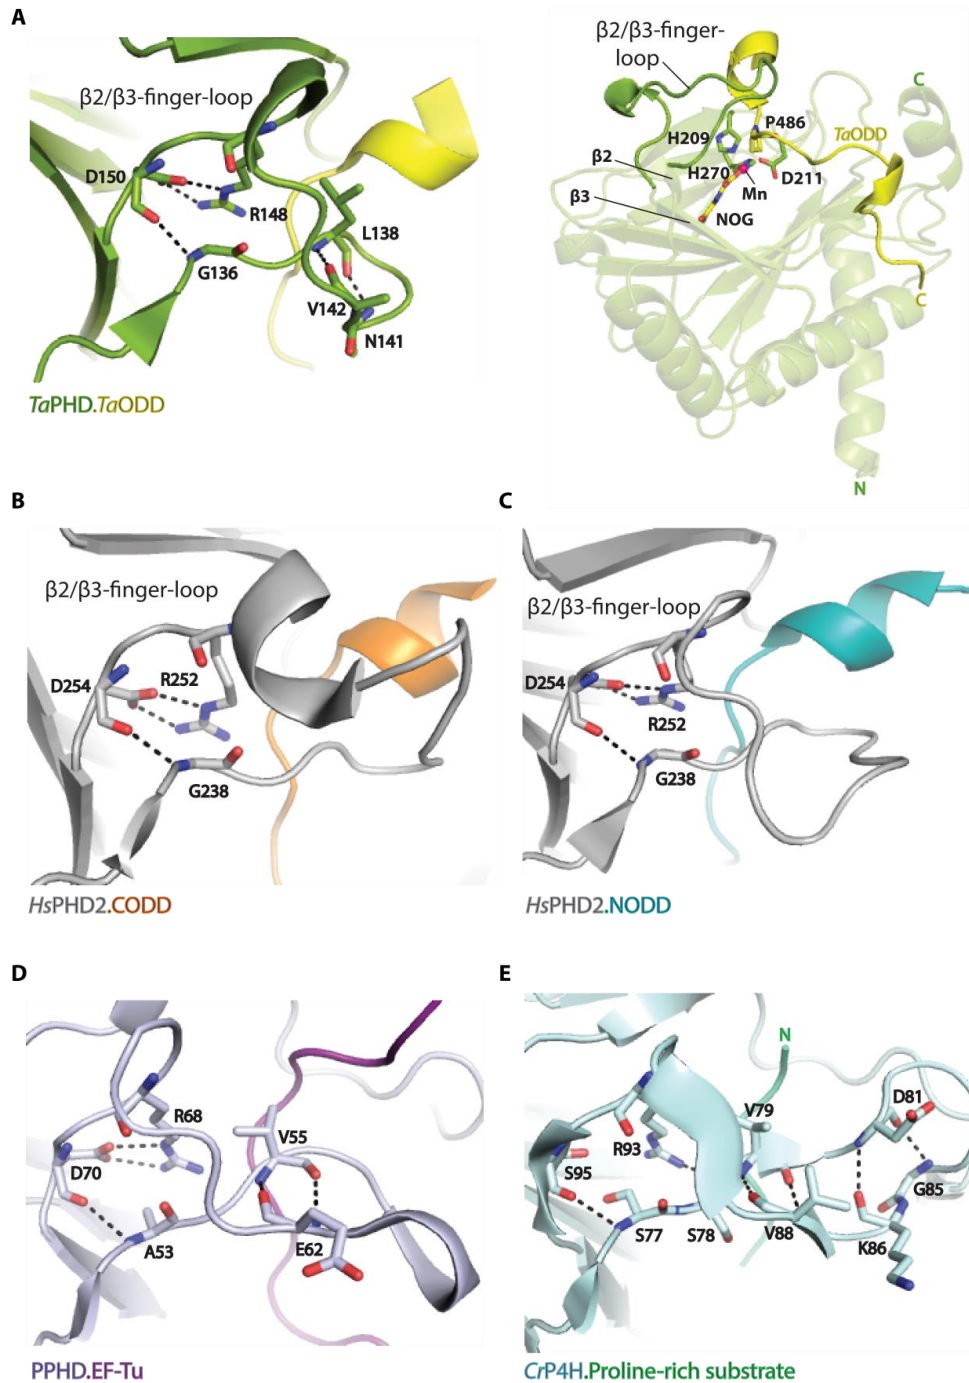

**Figure S3 | Views of the  $\beta 2/\beta 3$ -finger-loop in the (A) *TaPHD.TaODD*, (B) *HsPHD2.CODD* (PDB: 3HQR, <sup>2</sup>), (C) *HsPHD2.NODD* (PDB: 5L9V, <sup>3</sup>), (D) *PPHD.EF-Tu*, (PDB: 4IW3, <sup>15</sup>), and (E) *CrP4H.Proline-rich substrate* (PDB: 3GZE, <sup>16</sup>) structures. Hydrogen bonding and electrostatic interactions between loop-residues are displayed. Notably, the  $\beta 2/\beta 3$ -finger-loop in the *TaPHD.TaODD* structure adopts a condensed, finger-like shape, which is stabilised via intra-loop-interactions.**



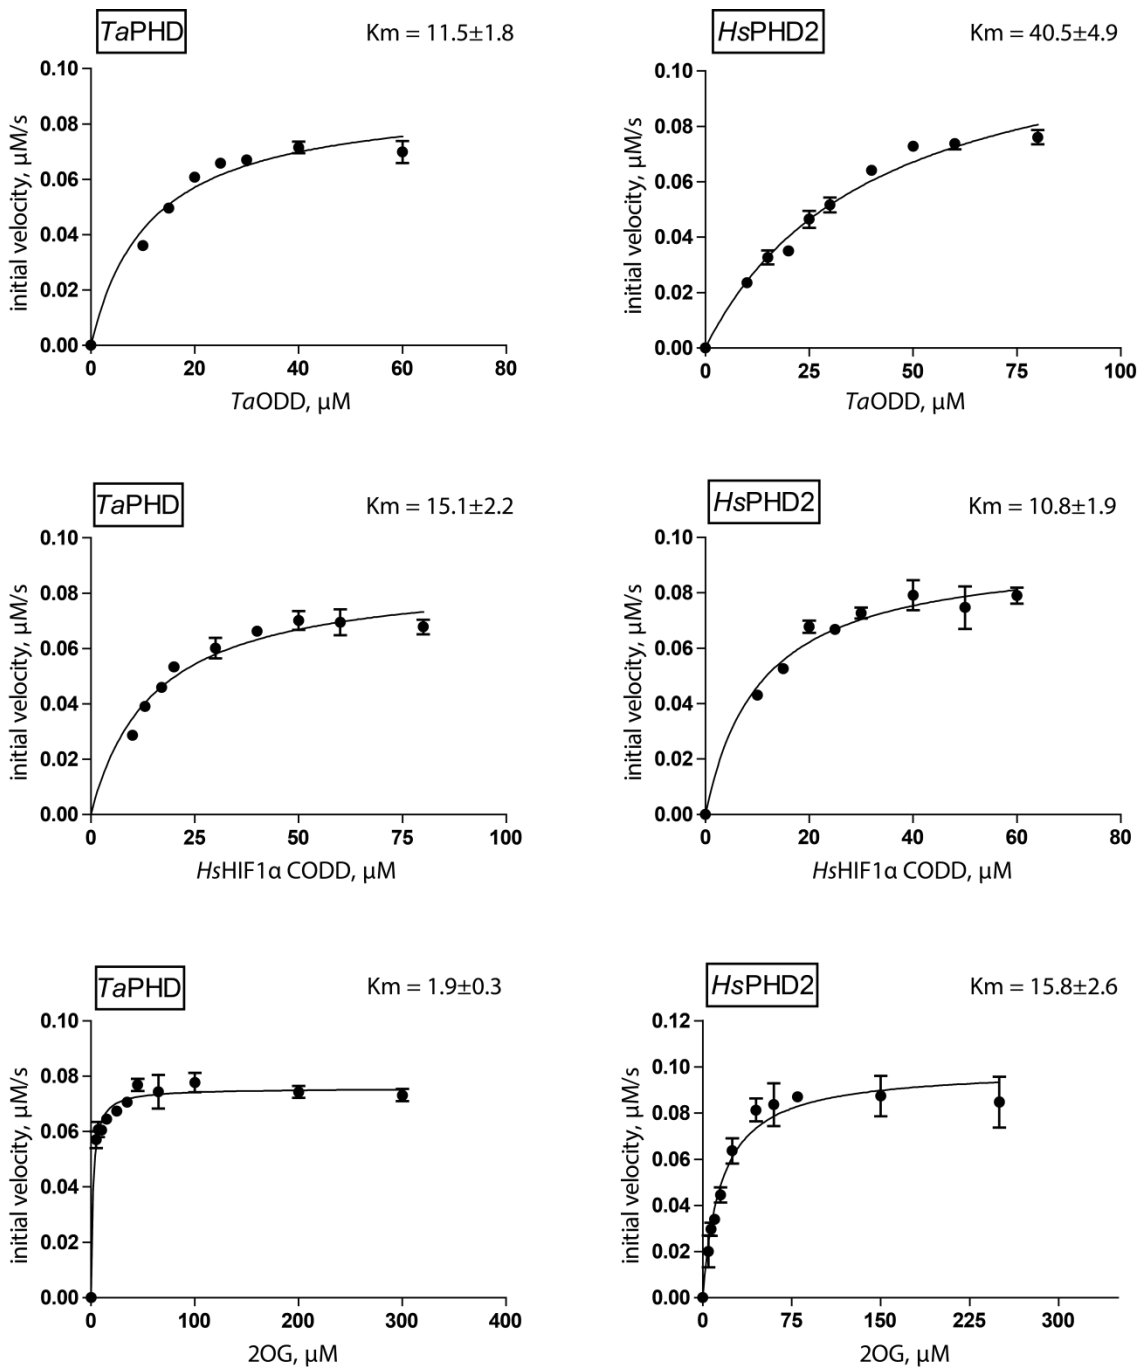

**Figure S4 | Comparison of kinetic parameters for *TaPHD* and *HsPHD2*.** Conditions: *HsPHD2* or *TaPHD* (3.5 μM-7.0 μM), *HsHIF1α* CODD 19mer peptide (DLDLEMLAPYIPMDDDFQL-NH<sub>2</sub>, 100 μM) or *TaHIF1α* ODD 25mer peptide (PINEKEDYDDLAPFVPPPSFDNRLY-NH<sub>2</sub>, 100 μM), (NH<sub>4</sub>)<sub>2</sub>Fe(II)(SO<sub>4</sub>)<sub>2</sub> (50 μM), sodium L-ascorbate (4 mM) and 2-oxoglutarate disodium salt (300 μM) in Tris (50 mM), pH 7.5.<sup>10</sup> Initial rates were determined by varying the concentration of the respective peptide or 2OG. Peptide hydroxylation was analysed by MALDI-MS, ‘background’ (i.e. non-enzymatic) methionine oxidation was subtracted, and the data were fitted with the Michaelis-Menten equation using GraphPad Prism® (errors are indicated as standard deviations, n=3).

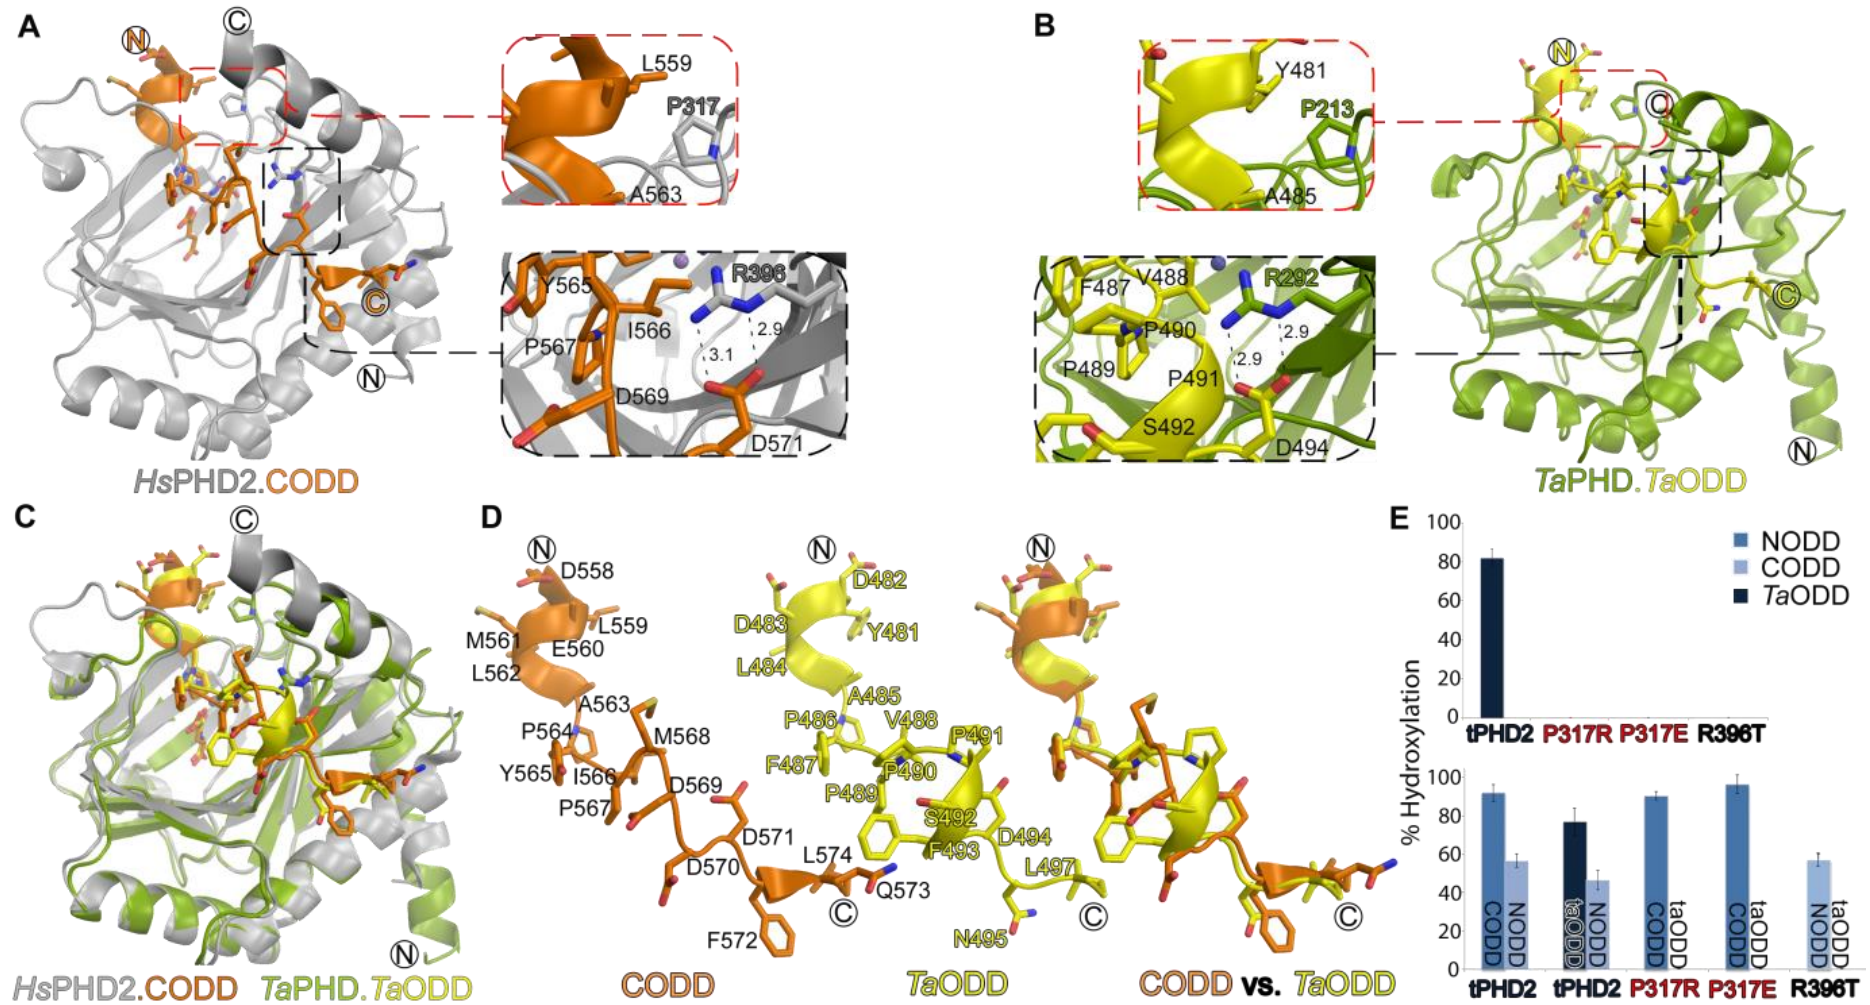

**Figure S5 | Analyses of *Hs*PHD2 and *Ta*PHD substrate complexes and assay results indicate a conserved mode of ODD binding to both *Hs*PHD2 and *Ta*PHD. (A-C)** Comparison of *Hs*PHD2.CODD (PDB: 3HQR, <sup>2</sup>), *Hs*PHD2.NODD (PDB: 5L9V, <sup>3</sup>), and *Ta*PHD substrate structures reveals similar binding modes for *Ta*ODD and *Hs*HIF1 $\alpha$  CODD. These include a salt-bridge between R292<sub>*Ta*PHD</sub> and D494<sub>*Ta*ODD</sub> (analogous to the salt-bridge between R396<sub>*Hs*PHD2</sub> and D571<sub>*Hs*HIF1 $\alpha$  CODD</sub>) and hydrophobic interactions with P213<sub>*Ta*PHD</sub> (analogously positioned P317<sub>*Hs*PHD2</sub>) and the YXXLAP/ LXXLAP motif. **(D)** Comparison of *Hs*HIF1 $\alpha$  CODD and *Ta*ODD conformations as observed in the *Hs*PHD2.CODD and *Ta*PHD.*Ta*ODD complexes.<sup>10</sup> **(E)** Endpoint hydroxylation assays with *N*-terminally truncated wild-type *Hs*PHD2 (tPHD2), and the R396<sub>*Hs*PHD2</sub> and P317<sub>*Hs*PHD2</sub> variants; (errors are indicated as standard deviations, n=3). Heterozygous mutations to R396<sub>*Hs*PHD2</sub> and P317<sub>*Hs*PHD2</sub> have been observed in patients with cancer and erythrocytosis.<sup>17-19</sup> The R396T<sub>*Hs*PHD2</sub> variant is highly selective for NODD over CODD, as it is not able to form the salt-bridge with CODD (R396<sub>*Hs*PHD2</sub> - D571<sub>*Hs*HIF1 $\alpha$  CODD</sub>). The P317R<sub>*Hs*PHD2</sub> variant is selective for CODD, as it forms less hydrophobic interactions (with both ODDs) than the wild-type *Hs*PHD2. However, because hydrophobic interactions with the LXXLAP residues play relatively more important roles in NODD compared to CODD catalysis,<sup>3</sup> P317R<sub>*Hs*PHD2</sub> does not hydroxylate *Hs*HIF1 $\alpha$  NODD.<sup>3</sup> The P317<sub>*Hs*PHD2</sub> and R396<sub>*Hs*PHD2</sub> residues, which are conserved in almost all PHDs in metazoans, were used to test if *Hs*PHD2 binds *Ta*ODD similarly as *Hs*HIF1 $\alpha$  CODD and NODD. The endpoint assay results **(E, top)** show that while tPHD2 can hydroxylate *Ta*ODD, both P317R<sub>*Hs*PHD2</sub> (and P317E<sub>*Hs*PHD2</sub>) and R396T<sub>*Hs*PHD2</sub> variants were inactive on *Ta*ODD (within detection limits), in a similar manner as the indicated tPHD2 variants lose their ability to hydroxylate *Hs*HIF1 $\alpha$  NODD or *Hs*HIF1 $\alpha$  CODD (respectively). Thus, the results of the assays in the upper panel support similar binding modes for *Ta*ODD and *Hs*HIF1 $\alpha$  CODD/NODD to *Hs*PHD2. Competition experiments were carried out (lower panel), where equimolar amounts of two ODDs (in a single assay mixture) were incubated with tPHD2, and the *Hs*PHD2 variants R396<sub>*Hs*PHD2</sub> and P317<sub>*Hs*PHD2</sub> **(E, bottom)**. The results imply that *Hs*PHD2 accepts the different ODDs with an order of activity of *Hs*HIF1 $\alpha$  CODD > *Ta*ODD > *Hs*HIF1 $\alpha$  NODD.

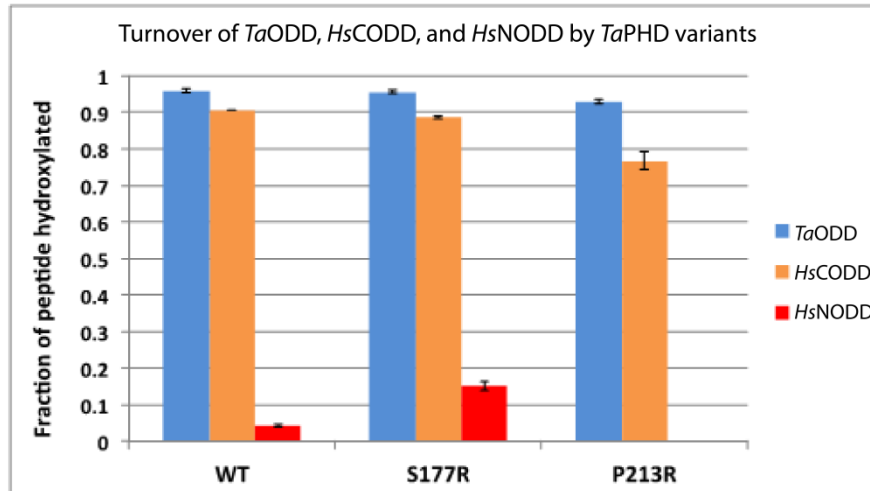

**Figure S6 | Effect of S177R<sub>TaPHD</sub> and P213R<sub>TaPHD</sub> substitutions on catalysis by TaPHD.** The activity of the TaPHD variants was measured using end-point hydroxylation assays (3 h incubation, 25 °C) (errors are indicated as standard deviations, n=3). Conditions: TaPHD (3.5 μM), TaHIFα ODD/HsCODD/HsNODD(100 μM), (NH<sub>4</sub>)<sub>2</sub>Fe(II)(SO<sub>4</sub>)<sub>2</sub> (50 μM), sodium L-ascorbate (4 mM) and 2-oxoglutarate disodium salt (300 μM) in Tris (50 mM), pH 7.5.<sup>10</sup> The residue R281<sub>HsPHD2</sub> that interacts with D412 within the NODD of HsHIF1α,<sup>3,20</sup> is conserved in HsPHD1 (R265), but not in TaPHD (S177) or in HsPHD3 (L103) (Figure S2, Table S1); HsPHD3 has a strong preference for CODD over NODD.<sup>21,22</sup> The S177R<sub>TaPHD</sub> variant manifests increased HsHIF1α NODD 19mer turnover, relative to wildtype TaPHD (from 4 % to 15 %), while the fraction of hydroxylated HsHIF1α CODD 19mer and TaODD 25mer was not affected in the same timeframe. The clinically observed variant P317R<sub>HsPHD2</sub> is associated with familial erythrocytosis.<sup>18,19</sup> The HsPHD2 variant P317R<sub>HsPHD2</sub> retains full activity on HsHIF1α CODD, but does not (within detection limits) hydroxylate HsHIF1α NODD.<sup>3</sup> In agreement with this, the TaPHD ‘analogue’ P213R<sub>TaPHD</sub> of the clinically observed mutation did not manifest any evidence for HsHIF1α NODD 19mer hydroxylation.

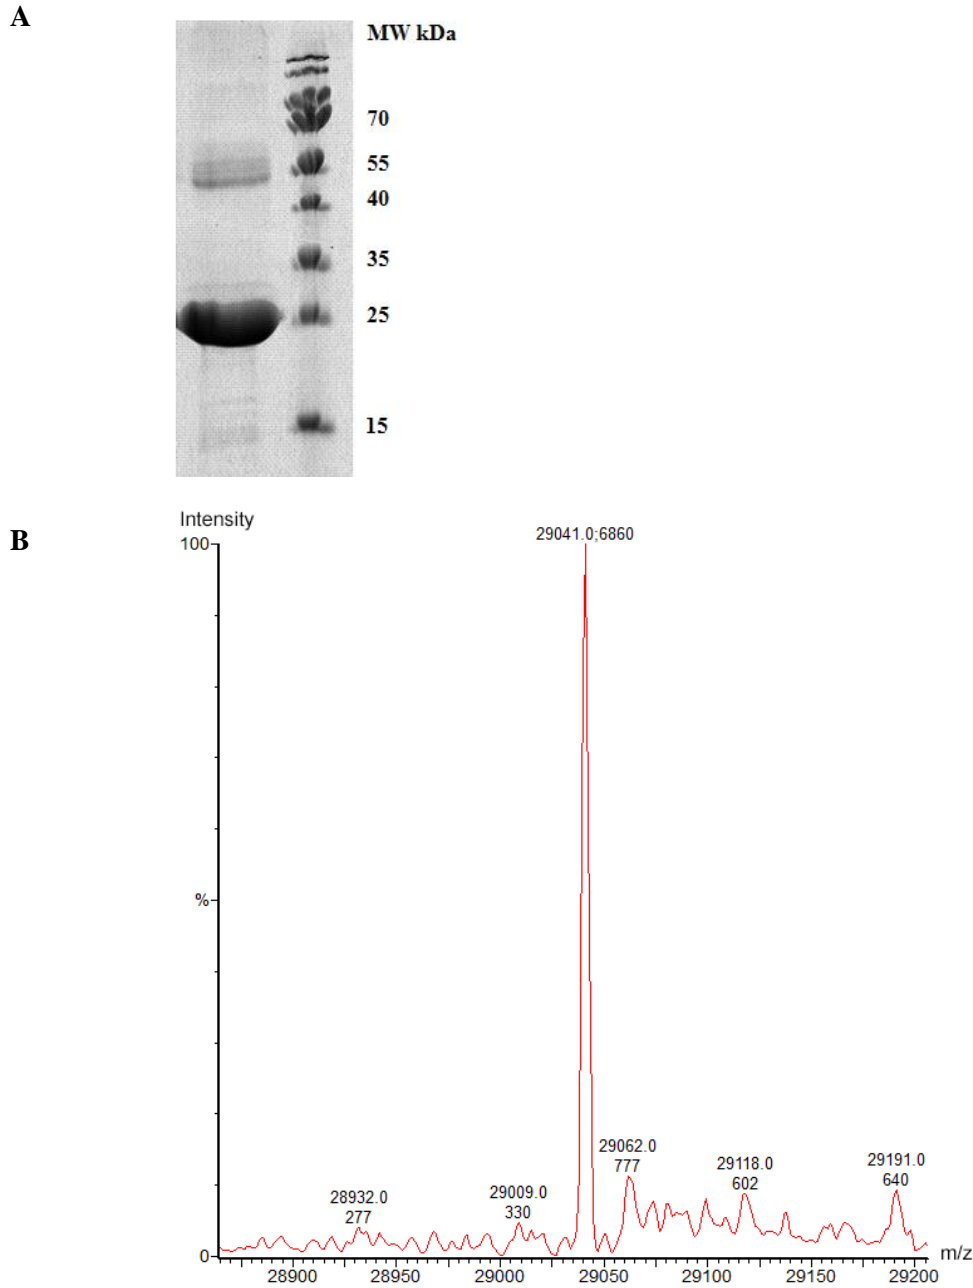

**Figure S7 | Purification of *TaPHD*<sup>64-300</sup>.** (A) SDS-PAGE gel of purified *TaPHD*<sup>64-300</sup> (MW= 29.2 kDa). (B) Electrospray ionisation (positive ion mode)-liquid chromatography-mass spectrometry (ESI-LC-MS) spectrum of *TaPHD*<sup>64-300</sup>. A peak corresponding to the calculated mass of *TaPHD*<sup>64-300</sup> minus the *N*-terminal methionine residue (MW = 29042 Da) is observed.

## 3. Supplementary tables

**Table S1** | Hydrogen bonds and hydrophobic interactions between *Ta*PHD and *Ta*ODD, as observed in the *Ta*PHD.*Ta*ODD structure, compared to the *Hs*PHD2.CODD structure (PDB: 3HQR, <sup>2</sup>) and *Hs*PHD2.NODD (PDB: 5L9V, <sup>3</sup>) structures (apparent potential hydrophobic interactions were defined using a cut-off distance of 4 Å).

| <i>Ta</i> PHD. <i>Ta</i> ODD |                      | <i>Hs</i> PHD2.CODD |                    | <i>Hs</i> PHD2.NODD       |                                | Structural region<br>in <i>Ta</i> PHD/<br><i>Hs</i> PHD2 |
|------------------------------|----------------------|---------------------|--------------------|---------------------------|--------------------------------|----------------------------------------------------------|
| Protein                      | Substrate            | Protein             | Substrate          | Protein                   | Substrate                      |                                                          |
| Gln137                       | Phe487*†             | Gln239              | Tyr565*†           | Gln239                    | Ala403*†                       | β2/β3                                                    |
|                              |                      | Leu240              | Tyr565*            | Leu240                    | Pro402*                        | β2/β3                                                    |
| Ala139                       | Ala485*†<br>Phe487*  | Val241              | Ala563*†           | Val241                    | Thr398*<br>Ala401*†<br>Pro402* | β2/β3                                                    |
|                              |                      | Ser242              | Glu560*†           | Ser242                    | Thr398*†<br>Leu399*            | β2/β3                                                    |
|                              |                      | Lys244              | Met561*            | Lys244                    | Leu399*                        | β2/β3                                                    |
| Asn141                       | Phe487*              |                     |                    |                           |                                | β2/β3                                                    |
| Ile147                       | Leu484*              | Ile251              | Leu562*            | Ile251                    | Leu400*                        | β2/β3                                                    |
| H2O-<br>Arg148NH             | Phe487†              | H2O-<br>Arg252NH    | Tyr565†            | H2O-<br>Arg252NH          | Ala403†                        | β2/β3                                                    |
| Trp154                       | Phe487*<br>Pro489*   | Trp258              | Ile566*<br>Pro567* |                           |                                | β3                                                       |
| Asp173                       | Leu497*              |                     |                    | Asp277                    | Leu411*                        | α3                                                       |
|                              |                      | Ile280              | Leu574*            |                           |                                | α3                                                       |
|                              |                      | Arg281              | Leu574†            | Cys281 <sup>mutated</sup> | Cys412 <sup>X</sup>            | α3                                                       |
| Ile188                       | Leu497*              | Ile292              | Leu574*            |                           |                                | α3/β4                                                    |
| Thr189                       | Leu497*†             | Asn293              | Leu574*†           | Asn293                    | Leu411*†                       | α3/β4                                                    |
| Gly190                       | Leu497*              | Gly294              | Leu574*            | Gly294                    | Ile408*<br>Leu411*             | α3/β4                                                    |
| Arg191                       | Asn495*†<br>Leu497*  | Arg295              | Phe572†<br>Leu574* | Arg295                    | Ile409*†                       | α3/β4                                                    |
| Thr192                       | Val488*              |                     |                    |                           |                                | α3/β4                                                    |
| Lys193                       | Phe493*              | Lys297              | Asp570*            | Lys297                    | Thr407*<br>Ile409*             | α3/β4                                                    |
| Tyr206                       | Leu484*†<br>Pro486*† | Tyr310              | Leu562†<br>Pro564† | Tyr310                    | Leu400*<br>†                   | β5                                                       |

*Evolution of HIF Prolyl Hydroxylases in Animals*

|        |                               |        |                               |                           |                     |        |
|--------|-------------------------------|--------|-------------------------------|---------------------------|---------------------|--------|
|        |                               |        |                               |                           | Pro402*             |        |
| Ile207 | Leu484*                       | Val311 | Leu562*                       | Val311                    | Leu400*             | β5     |
| Arg208 | Tyr481*†                      |        |                               |                           |                     | β5     |
| His209 | Tyr481*<br>Leu484*<br>Pro486* | His313 | Leu562*<br>Pro564*            | His313                    | Leu400*<br>Pro402*  | β5     |
| Ile210 | Tyr481*                       | Val314 | Leu559*                       |                           |                     | β5     |
| Asp211 | Pro486*                       | Asp315 | Pro564*                       | Asp315                    | Pro402*             | β5     |
| Pro213 | Tyr481*<br>Ala485*            | Pro317 | Leu559*<br>Ala563*            | Cys317 <sup>mutated</sup> | Cys397 <sup>X</sup> | β5/β6  |
| Asp216 | Val488*                       |        |                               |                           |                     | β5/β6  |
| Arg218 | Pro486†<br>Val488*            | Arg322 | Pro564†<br>Ile566*            | Arg322                    | Pro402†<br>Ala404*  | β5/β6  |
| Arg266 | Asp482†                       | Arg370 | Leu559*                       | Arg370                    | Asp395†             | β9/β10 |
| Trp285 | Pro486*                       | Trp389 | Pro564*<br>Ile566*            | Trp389                    | Pro402*             | β11    |
| Tyr286 | Leu497*                       | Tyr390 | Leu574*                       | Tyr390                    | Leu411*             | β11    |
| Phe287 | Val488*<br>Asp494*            | Phe391 | Ile566*                       | Phe391                    | Ile408*             | β11/α4 |
| Arg292 | Pro489†<br>Asp494†            | Arg396 | Pro567†<br>Met568†<br>Asp571† | Arg396                    | Ile408*             | α4     |
| Ser295 | Pro491*                       |        |                               |                           |                     | α4     |
| Ser296 | Pro491*                       | Lys400 | Asp571†                       |                           |                     | α4     |
|        |                               | Tyr403 | Met568*                       |                           |                     |        |
|        |                               | Leu404 | Met568*                       |                           |                     |        |

\* Apparent potential hydrophobic interaction.

† Hydrogen bond.

<sup>X</sup> Disulfide bond.

**Table S2 | Analysis of structural conservation between *Ta*PHD, *Hs*PHD2, PPHD, and *Cr*P4H.** Pairs of structures (structures 1 and 2) were aligned and root-mean-square deviations (RMSD) of atomic positions for all C $\alpha$  (residues defined in the table) were determined using PyMOL.

| <b>Structure 1</b>                                                                                | <b>Structure 2</b>                                                                                                | <b>RMSD<br/>for all C<math>\alpha</math> in Å</b> |
|---------------------------------------------------------------------------------------------------|-------------------------------------------------------------------------------------------------------------------|---------------------------------------------------|
| <b><i>Ta</i>PHD.<i>Ta</i>ODD</b><br>( <i>Ta</i> PHD <sub>C73-Q297</sub> )                         | <b><i>Hs</i>PHD2.CODD</b><br>( <i>Hs</i> PHD2 <sub>Q184-K408</sub> )<br>(PDB: 3HQR, <sup>2</sup> )                | 0.54                                              |
| <b><i>Ta</i>PHD.<i>Ta</i>ODD</b><br>( <i>Ta</i> PHD <sub>C73-Q297</sub> )                         | <b><i>Hs</i>PHD2.NODD</b><br>( <i>Hs</i> PHD2 <sub>P189-Y403</sub> )<br>(PDB: 5L9V, <sup>3</sup> )                | 0.39                                              |
| <b><i>Ta</i>PHD.<i>Ta</i>ODD</b><br>( <i>Ta</i> PHD <sub>C73-Q297</sub> )                         | <b>PPHD.EF-Tu</b><br>(PPHD <sub>H7-F207</sub> )<br>(PDB: 4IW3, <sup>15</sup> )                                    | 0.92                                              |
| <b><i>Ta</i>PHD.<i>Ta</i>ODD</b><br>( <i>Ta</i> PHD <sub>C73-Q297</sub> )                         | <b><i>Cr</i>P4H.(Ser-Pro)<sub>5</sub></b><br>( <i>Cr</i> P4H <sub>W38-G250</sub> )<br>(PDB: 3GZE, <sup>16</sup> ) | 2.20                                              |
| <b><i>Hs</i>PHD2.CODD</b><br>( <i>Hs</i> PHD <sub>Q184-K408</sub> )<br>(PDB: 3HQR, <sup>2</sup> ) | <b>PPHD.EF-Tu</b><br>(PPHD <sub>H7-F207</sub> )<br>(PDB: 4IW3, <sup>15</sup> )                                    | 1.57                                              |



## References

- 1 Loenarz, C. *et al.* The hypoxia-inducible transcription factor pathway regulates oxygen sensing in the simplest animal, *Trichoplax adhaerens*. *EMBO Reports* **12**, 63-70, doi:10.1038/embor.2010.170 (2011).
- 2 Chowdhury, R. *et al.* Structural basis for binding of hypoxia-inducible factor to the oxygen-sensing prolyl hydroxylases. *Structure* **17**, 981-989, doi:10.1016/j.str.2009.06.002 (2009).
- 3 Chowdhury, R. *et al.* Structural basis for oxygen degradation domain selectivity of the HIF prolyl hydroxylases. *Nat. Commun.* **7**, 12673, doi:10.1038/ncomms12673 (2016).
- 4 Rose, N. R., McDonough, M. A., King, O. N. F., Kawamura, A. & Schofield, C. J. Inhibition of 2-oxoglutarate dependent oxygenases. *Chem. Soc. Rev.* **40**, 4364-4397, doi:10.1039/C0CS00203H (2011).
- 5 Otwinowski, Z., Minor, W. & et al. Processing of X-ray diffraction data collected in oscillation mode. *Methods Enzymol.* **276**, 307-326 (1997).
- 6 McCoy, A. J. *et al.* Phaser crystallographic software. *J. Applied Crystal.* **40**, 658-674, doi:doi:10.1107/S0021889807021206 (2007).
- 7 Adams, P. D. *et al.* PHENIX: a comprehensive Python-based system for macromolecular structure solution. *Acta Crystallographica Section D* **66**, 213-221, doi:doi:10.1107/S0907444909052925 (2010).
- 8 Emsley, P. & Cowtan, K. Coot: model-building tools for molecular graphics. *Acta Cryst. D* **60**, 2126-2132, doi:10.1107/S0907444904019158 (2004).
- 9 Aguilar, J. A., Nilsson, M., Bodenhausen, G. & Morris, G. A. Spin echo NMR spectra without J modulation. *Chem. Commun.* **48**, 811-813, doi:10.1039/C1CC16699A (2012).
- 10 Flashman, E. *et al.* Kinetic rationale for selectivity toward N- and C-terminal oxygen-dependent degradation domain substrates mediated by a loop region of hypoxia-inducible factor prolyl hydroxylases. *J. Biol. Chem.* **283**, 3808-3815, doi:10.1074/jbc.M707411200 (2008).
- 11 Tarhonskaya, H. *et al.* Investigating the contribution of the active site environment to the slow reaction of hypoxia-inducible factor prolyl hydroxylase domain 2 with oxygen. *Biochem. J.* **463**, 363-372, doi:10.1042/BJ20140779 (2014).
- 12 Flashman, E. *et al.* Evidence for the slow reaction of hypoxia-inducible factor prolyl hydroxylase 2 with oxygen. *FEBS J.* **277**, 4089-4099, doi:10.1111/j.1742-4658.2010.07804.x (2010).
- 13 Sievers, F. *et al.* Fast, scalable generation of high-quality protein multiple sequence alignments using Clustal Omega. *Mol. Syst. Biol.* **7**, doi:10.1038/msb.2011.75 (2011).
- 14 Waterhouse, A. M., Procter, J. B., Martin, D. M. A., Clamp, M. & Barton, G. J. Jalview Version 2—a multiple sequence alignment editor and analysis workbench. *Bioinformatics* **25**, 1189-1191, doi:10.1093/bioinformatics/btp033 (2009).
- 15 Scotti, J. S. *et al.* Human oxygen sensing may have origins in prokaryotic elongation factor Tu prolyl-hydroxylation. *Proc. Natl. Acad. Sci. U.S.A.* **111**, 13331-13336, doi:10.1073/pnas.1409916111 (2014).
- 16 Koski, M. K. *et al.* The crystal structure of an algal prolyl 4-hydroxylase complexed with a proline-rich peptide reveals a novel buried tripeptide binding motif. *The Journal of biological chemistry* **284**, 25290-25301, doi:10.1074/jbc.M109.014050 (2009).
- 17 Bamford, S. *et al.* The COSMIC (Catalogue of Somatic Mutations in Cancer) database and website. *Br. J. Cancer* **91**, 355-358 (2004).
- 18 Percy, M. J. *et al.* A family with erythrocytosis establishes a role for prolyl hydroxylase domain protein 2 in oxygen homeostasis. *Proc. Natl. Acad. Sci. U.S.A.* **103**, 654-659, doi:10.1073/pnas.0508423103 (2006).

- 19 Arsenault, P. R. *et al.* A Knock-in Mouse Model of Human PHD2 Gene-associated Erythrocytosis Establishes a Haploinsufficiency Mechanism. *J. Biol. Chem.* **288**, 33571-33584, doi:10.1074/jbc.M113.482364 (2013).
- 20 Chowdhury, R., Hardy, A. & Schofield, C. J. The human oxygen sensing machinery and its manipulation. *Chem. Soc. Rev.* **37**, 1308-1319, doi:10.1039/b701676j (2008).
- 21 Epstein, A. C. *et al.* *C. elegans* EGL-9 and mammalian homologs define a family of dioxygenases that regulate HIF by prolyl hydroxylation. *Cell* **107**, 43-54 (2001).
- 22 Hirsila, M., Koivunen, P., Gunzler, V., Kivirikko, K. I. & Myllyharju, J. Characterization of the human prolyl 4-hydroxylases that modify the hypoxia-inducible factor. *J. Biol. Chem.* **278**, 30772-30780, doi:10.1074/jbc.M304982200 (2003).
